# Supplementary material for: Early Years Physical Activity and Motor Skills Intervention—A Feasibility Study to Evaluate an Existing Training Programme for Early Years Educators
Source: MDPI journal article supplement (doi:10.3390/children10010145), 2023-01-11
Supplement: s1 [file s1]

**Supplementary Table S1.** Observations of Educator behaviour at baseline

| <b>Baseline observation</b>                                                                                                                               | <b>Intervention</b> |          | <b>Control</b>  |          |
|-----------------------------------------------------------------------------------------------------------------------------------------------------------|---------------------|----------|-----------------|----------|
| <b>Activity</b>                                                                                                                                           | <b>Observed</b>     | <b>n</b> | <b>Observed</b> | <b>n</b> |
| Educators plan the movement activities beforehand                                                                                                         | No<br>Yes           | 2<br>3   | No<br>Yes       | 3<br>0   |
| Educators promote activities that encourage children to move around                                                                                       | No<br>Yes           | 1<br>4   | No<br>Yes       | 0<br>3   |
| Children are encouraged to play outside                                                                                                                   | No<br>Yes           | 1<br>4   | No<br>Yes       | 1<br>2   |
| Educators promote activities that encourage children to run                                                                                               | No<br>Yes           | 2<br>3   | No<br>Yes       | 3<br>0   |
| Educators promote activities that encourage children to dance                                                                                             | No<br>Yes           | 1<br>4   | No<br>Yes       | 1<br>2   |
| Educators promote activities that encourage children to hop and jump in different ways                                                                    | No<br>Yes           | 2<br>3   | No<br>Yes       | 3<br>0   |
| Children are taught about the different ways to jump                                                                                                      | No<br>Yes           | 2<br>3   | No<br>Yes       | 3<br>0   |
| Educators promote activities that give children the opportunity to be involved in challenging movement situations which involves coordination and balance | No<br>Yes           | 2<br>3   | No<br>Yes       | 2<br>1   |
| Educators guide children on activities that involve coordination and balance                                                                              | No<br>Yes           | 2<br>3   | No<br>Yes       | 2<br>1   |

|                                                                         |           |        |           |        |
|-------------------------------------------------------------------------|-----------|--------|-----------|--------|
| Educators promote activities that encourage children to throw and catch | No<br>Yes | 1<br>4 | No<br>Yes | 2<br>1 |
| Children are taught how to throw and catch                              | No<br>Yes | 1<br>4 | No<br>Yes | 2<br>1 |
| Educators promote activities that give children the opportunity to skip | No<br>Yes | 4<br>1 | No<br>Yes | 3<br>0 |
| Children are taught how to skip                                         | No<br>Yes | 3<br>2 | No<br>Yes | 3<br>0 |
| Educators try to engage all children in the activity                    | No<br>Yes | 1<br>4 | No<br>Yes | 1<br>2 |

**Supplementary Table S2.** Results of the questionnaire measuring Educator behavioural predictors at baseline (completed by Intervention Educators only, n=10).

| Domain*                              | Median | Minimum | Maximum |
|--------------------------------------|--------|---------|---------|
| Knowledge                            | 5.3    | 2.5     | 6.8     |
| Skills                               | 4.5    | 2.3     | 7.0     |
| Social/Professional role & identity  | 6.6    | 5.8     | 7.0     |
| Belief about Capabilities            | 5.3    | 4.3     | 7.0     |
| Optimism                             | 6.0    | 4.0     | 7.0     |
| Beliefs about consequences           | 7.0    | 3.5     | 7.0     |
| Intentions                           | 7.0    | 5.3     | 7.0     |
| Goals - Action Planning              | 5.3    | 2.0     | 7.0     |
| Goals - priority                     | 4.8    | 2.0     | 7.0     |
| Memory, attention & decision process | 5.1    | 3.8     | 6.0     |
| Environmental context and resources  | 3.8    | 1.0     | 6.0     |
| Social influences                    | 6.0    | 4.0     | 7.0     |
| Emotion                              | 5.3    | 4.5     | 7.0     |
| Behavioural regulation               | 5.5    | 2.5     | 7.0     |
| Social and professional role         | 4.8    | 4.0     | 6.0     |
| Work Environment                     | 6.1    | 2.4     | 7.0     |

\*Answers ranged on a scale of 1-7, where 1=strongly disagree/never, and 7=strongly agree/always; mean taken for all questions in the domain.

**Supplementary Table S3.** Participants' characteristics (children) at baseline (N=43)

|                              | Baseline                             |                                 | Follow-up                            |                                |
|------------------------------|--------------------------------------|---------------------------------|--------------------------------------|--------------------------------|
|                              | Intervention (n=30)<br>Mean $\pm$ SD | Control (n=13)<br>Mean $\pm$ SD | Intervention (n=23)<br>Mean $\pm$ SD | Control (n=5)<br>Mean $\pm$ SD |
| Age (years)                  | 3.6 $\pm$ 0.7                        | 3.5 $\pm$ 0.5                   | -                                    | -                              |
| Gender (% female)            | 40                                   | 61.5                            | -                                    | -                              |
| Anthropometrics              |                                      |                                 |                                      |                                |
| Height (cm)                  | 101.6 $\pm$ 6.6                      | 99.0 $\pm$ 6.1                  | 107.3 $\pm$ 6.1                      | 99.3 $\pm$ 2.5                 |
| Weight (kg)                  | 16.7 $\pm$ 2.4                       | 16.7 $\pm$ 2.9                  | 18.6 $\pm$ 3.2                       | 16.0 $\pm$ 1.8                 |
| BMI z-score                  | 0.20 $\pm$ 1.17                      | 0.1 $\pm$ 1.4                   | 0.61 $\pm$ 0.91                      | 0.37 $\pm$ 0.86                |
| Fundamental Motor Skills     |                                      |                                 |                                      |                                |
| FMS total score              | 72.7 $\pm$ 15.7                      | 59.9 $\pm$ 24.1                 | 77.0 $\pm$ 13.0                      | 72.4 $\pm$ 8.1                 |
| FMS standard score           | 9.0 $\pm$ 3.4                        | 6.9 $\pm$ 4.5                   | 9.9 $\pm$ 3.1                        | 8.8 $\pm$ 1.9                  |
| FMS percentile               | 41.5 $\pm$ 33.6                      | 28.4 $\pm$ 34.3                 | 47.4 $\pm$ 31.2                      | 35.6 $\pm$ 23.3                |
| Physical Activity (ActivPAL) | <b>n=21</b>                          | <b>n=6</b>                      | <b>n=15</b>                          | <b>n=0</b>                     |
| Time sitting (%)             | 43.8 $\pm$ 10.6                      | 36.3 $\pm$ 14.1                 | 55.5 $\pm$ 10.8                      | -                              |

|                   |                |                 |                |   |
|-------------------|----------------|-----------------|----------------|---|
| Time standing (%) | $33.4 \pm 8.6$ | $38.3 \pm 10.9$ | $30.0 \pm 8.2$ | - |
| Time stepping (%) | $22.8 \pm 6.0$ | $25.4 \pm 6.3$  | $14.5 \pm 4.6$ | - |

---

**Supplementary Table S4.** Intervention group comparison follow-up – baseline

|                                    | <b>Mean difference (95% CI)</b> | <b>P value</b> |
|------------------------------------|---------------------------------|----------------|
| Child anthropometrics (n=23)       |                                 |                |
| Weight (kg)                        | 1.6 (1.0 to 2.2)                | <0.0001        |
| BMI z-score                        | 0.14 (-0.31 to 0.59)            | 0.516          |
| Fundamental Motor Skills (n=23)    |                                 |                |
| FMS total score                    | 3.8 (-2.8 to 10.4)              | 0.249          |
| FMS standard score                 | 0.8 (-0.7 to 2.3)               | 0.281          |
| FMS percentile                     | 4.8 (-9.0 to 18.6)              | 0.481          |
| Physical Activity (ActivPAL) (n=7) |                                 |                |
| Time sitting (%)                   | 10.8 (-3.9 to 25.5)             | 0.122          |
| Time standing (%)                  | -2.8 (-11.6 to 6.0)             | 0.466          |
| Time stepping (%)                  | -8.0 (-14.4 to -1.6)            | 0.022          |
