# Supplementary material for: Early Years Physical Activity and Motor Skills Intervention—A Feasibility Study to Evaluate an Existing Training Programme for Early Years Educators
Source: MDPI journal article supplement (doi:10.3390/children10010145), 2023-01-11
Supplement: s1 [file s1]

### Implementation questionnaire

Please read each question with care and answer each question with an X on a box (1-7) .  
Please answer what first comes to your mind. There is no right or wrong answer but only what is important for you. Thank you for your collaboration.

1. I am aware of the contents and objectives of physical activity guidelines for early years.

|                      |   |   |   |   |   |                   |
|----------------------|---|---|---|---|---|-------------------|
|                      |   |   |   |   |   |                   |
| 1                    | 2 | 3 | 4 | 5 | 6 | 7                 |
| Strongly<br>Disagree |   |   |   |   |   | Strongly<br>Agree |

2. I know the contents and objectives of physical activity guidelines for early years.

|                      |   |   |   |   |   |                   |
|----------------------|---|---|---|---|---|-------------------|
|                      |   |   |   |   |   |                   |
| 1                    | 2 | 3 | 4 | 5 | 6 | 7                 |
| Strongly<br>Disagree |   |   |   |   |   | Strongly<br>Agree |

3. I am familiar with the contents and objectives of physical activity guidelines for early years.

|                      |   |   |   |   |   |                   |
|----------------------|---|---|---|---|---|-------------------|
|                      |   |   |   |   |   |                   |
| 1                    | 2 | 3 | 4 | 5 | 6 | 7                 |
| Strongly<br>Disagree |   |   |   |   |   | Strongly<br>Agree |

4. I am aware of how to implement physical activity in my nursery/school with young children when at work.

|                      |   |   |   |   |   |                   |
|----------------------|---|---|---|---|---|-------------------|
|                      |   |   |   |   |   |                   |
| 1                    | 2 | 3 | 4 | 5 | 6 | 7                 |
| Strongly<br>Disagree |   |   |   |   |   | Strongly<br>Agree |

5. I have undertaken training on how to implement physical activity in my nursery/school when at work with young children.

|                      |   |   |   |   |   |                   |
|----------------------|---|---|---|---|---|-------------------|
|                      |   |   |   |   |   |                   |
| 1                    | 2 | 3 | 4 | 5 | 6 | 7                 |
| Strongly<br>Disagree |   |   |   |   |   | Strongly<br>Agree |

6. I have the skills to implement physical activity in my nursery/school when at work with young children.

|                      |   |   |   |   |   |                   |
|----------------------|---|---|---|---|---|-------------------|
|                      |   |   |   |   |   |                   |
| 1                    | 2 | 3 | 4 | 5 | 6 | 7                 |
| Strongly<br>Disagree |   |   |   |   |   | Strongly<br>Agree |

7. I have practiced implementing physical activity in my nursery/school when at work with young children.

|                      |   |   |   |   |   |                   |
|----------------------|---|---|---|---|---|-------------------|
|                      |   |   |   |   |   |                   |
| 1                    | 2 | 3 | 4 | 5 | 6 | 7                 |
| Strongly<br>Disagree |   |   |   |   |   | Strongly<br>Agree |

8. Implementing physical activity in nursery/school when at work with young children is part of my work as an educator.

|                      |   |   |   |   |   |                   |  |
|----------------------|---|---|---|---|---|-------------------|--|
|                      |   |   |   |   |   |                   |  |
| 1                    | 2 | 3 | 4 | 5 | 6 | 7                 |  |
| Strongly<br>Disagree |   |   |   |   |   | Strongly<br>Agree |  |

9. As an early years educator it is my job to implement physical activity in my nursery/school when at work with young children.

|                      |   |   |   |   |   |                   |
|----------------------|---|---|---|---|---|-------------------|
|                      |   |   |   |   |   |                   |
| 1                    | 2 | 3 | 4 | 5 | 6 | 7                 |
| Strongly<br>Disagree |   |   |   |   |   | Strongly<br>Agree |

10. It is my responsibility as an early years educator to implement physical activity in my nursery/school when at work with young children.

|                      |   |   |   |   |   |                   |
|----------------------|---|---|---|---|---|-------------------|
|                      |   |   |   |   |   |                   |
| 1                    | 2 | 3 | 4 | 5 | 6 | 7                 |
| Strongly<br>Disagree |   |   |   |   |   | Strongly<br>Agree |

11. Implementing physical activity in early year settings when at work with young children is consistent with my early years educator role.

|                      |   |   |   |   |   |                   |
|----------------------|---|---|---|---|---|-------------------|
|                      |   |   |   |   |   |                   |
| 1                    | 2 | 3 | 4 | 5 | 6 | 7                 |
| Strongly<br>Disagree |   |   |   |   |   | Strongly<br>Agree |

12. I am confident that I can implement physical activity in my nursery/school when at work with young children even when young children are not motivated.

|                      |   |   |   |   |   |                   |
|----------------------|---|---|---|---|---|-------------------|
|                      |   |   |   |   |   |                   |
| 1                    | 2 | 3 | 4 | 5 | 6 | 7                 |
| Strongly<br>Disagree |   |   |   |   |   | Strongly<br>Agree |

13. I am confident that I can implement physical activity in my nursery/school when at work with young children even when there is little time.

|                      |   |   |   |   |   |                   |
|----------------------|---|---|---|---|---|-------------------|
|                      |   |   |   |   |   |                   |
| 1                    | 2 | 3 | 4 | 5 | 6 | 7                 |
| Strongly<br>Disagree |   |   |   |   |   | Strongly<br>Agree |

14. I am confident that if I wanted I could implement physical activity in my nursery/school when at work with young children

|                      |   |   |   |   |   |                   |
|----------------------|---|---|---|---|---|-------------------|
|                      |   |   |   |   |   |                   |
| 1                    | 2 | 3 | 4 | 5 | 6 | 7                 |
| Strongly<br>Disagree |   |   |   |   |   | Strongly<br>Agree |

15. With regards to implement physical activity in my nursery/school when at work with young children in uncertain times, I usually expect the best.

|                      |   |   |   |   |   |                   |
|----------------------|---|---|---|---|---|-------------------|
|                      |   |   |   |   |   |                   |
| 1                    | 2 | 3 | 4 | 5 | 6 | 7                 |
| Strongly<br>Disagree |   |   |   |   |   | Strongly<br>Agree |

16. In relation to implement physical activity in my nursery/school, when at work with young children, I'm always optimistic about the future.

|                      |   |   |   |   |   |                   |
|----------------------|---|---|---|---|---|-------------------|
|                      |   |   |   |   |   |                   |
| 1                    | 2 | 3 | 4 | 5 | 6 | 7                 |
| Strongly<br>Disagree |   |   |   |   |   | Strongly<br>Agree |

17. If I implement physical activity in my nursery/school, when at work with young children, this will benefit children's health.

|                      |   |   |   |   |   |                   |
|----------------------|---|---|---|---|---|-------------------|
|                      |   |   |   |   |   |                   |
| 1                    | 2 | 3 | 4 | 5 | 6 | 7                 |
| Strongly<br>Disagree |   |   |   |   |   | Strongly<br>Agree |

18. If I implement physical activity in my nursery/school, when at work with young children, it will have disadvantages for my relationship with young children.

|                      |   |   |   |   |   |                   |
|----------------------|---|---|---|---|---|-------------------|
|                      |   |   |   |   |   |                   |
| 1                    | 2 | 3 | 4 | 5 | 6 | 7                 |
| Strongly<br>Disagree |   |   |   |   |   | Strongly<br>Agree |

19. I will definitely implement physical activity in my nursery/school with young children next time I am at work.

|                      |   |   |   |   |   |                   |
|----------------------|---|---|---|---|---|-------------------|
|                      |   |   |   |   |   |                   |
| 1                    | 2 | 3 | 4 | 5 | 6 | 7                 |
| Strongly<br>Disagree |   |   |   |   |   | Strongly<br>Agree |

20. I intend to implement physical activity in my nursery/school with young children next time I am at work.

|                      |   |   |   |   |   |                   |
|----------------------|---|---|---|---|---|-------------------|
|                      |   |   |   |   |   |                   |
| 1                    | 2 | 3 | 4 | 5 | 6 | 7                 |
| Strongly<br>Disagree |   |   |   |   |   | Strongly<br>Agree |

21. How strong is your intention to implement physical activity with young children in your nursery/school next time you are at work?

|                      |   |   |   |   |   |                   |
|----------------------|---|---|---|---|---|-------------------|
|                      |   |   |   |   |   |                   |
| 1                    | 2 | 3 | 4 | 5 | 6 | 7                 |
| Strongly<br>Disagree |   |   |   |   |   | Strongly<br>Agree |

22. I have a clear plan of how I will implement physical activity in my nursery/school when at work with young children.

|                      |   |   |   |   |   |                   |
|----------------------|---|---|---|---|---|-------------------|
|                      |   |   |   |   |   |                   |
| 1                    | 2 | 3 | 4 | 5 | 6 | 7                 |
| Strongly<br>Disagree |   |   |   |   |   | Strongly<br>Agree |

23. I have a clear plan on under what circumstances I will implement physical activity in my nursery/school, when at work with young children.

|                      |   |   |   |   |   |                   |
|----------------------|---|---|---|---|---|-------------------|
|                      |   |   |   |   |   |                   |
| 1                    | 2 | 3 | 4 | 5 | 6 | 7                 |
| Strongly<br>Disagree |   |   |   |   |   | Strongly<br>Agree |

24. I have a clear plan when I will implement physical activity in my nursery/school, when at work with young children.

|                      |   |   |   |   |   |                   |
|----------------------|---|---|---|---|---|-------------------|
|                      |   |   |   |   |   |                   |
| 1                    | 2 | 3 | 4 | 5 | 6 | 7                 |
| Strongly<br>Disagree |   |   |   |   |   | Strongly<br>Agree |

25. I have a clear plan on how often I will implement physical activity in my nursery/school, when at work with young children.

|                      |   |   |   |   |   |                   |
|----------------------|---|---|---|---|---|-------------------|
|                      |   |   |   |   |   |                   |
| 1                    | 2 | 3 | 4 | 5 | 6 | 7                 |
| Strongly<br>Disagree |   |   |   |   |   | Strongly<br>Agree |

26. Generally in your nursery/school, when at work with children, how often is covering something else on your agenda a higher priority than implementing physical activity?

|       |   |   |   |   |   |        |
|-------|---|---|---|---|---|--------|
|       |   |   |   |   |   |        |
| 1     | 2 | 3 | 4 | 5 | 6 | 7      |
| Never |   |   |   |   |   | Always |

27. Generally in your nursery/school, when at work with children, how often does covering something else on your agenda take precedence over implementing physical activity?

|       |   |   |   |   |   |        |
|-------|---|---|---|---|---|--------|
|       |   |   |   |   |   |        |
| 1     | 2 | 3 | 4 | 5 | 6 | 7      |
| Never |   |   |   |   |   | Always |

28. Generally in your nursery/school, when at work with children, how often is covering something else on your agenda more urgent than implementing physical activity?

|       |   |   |   |   |   |        |
|-------|---|---|---|---|---|--------|
|       |   |   |   |   |   |        |
| 1     | 2 | 3 | 4 | 5 | 6 | 7      |
| Never |   |   |   |   |   | Always |

29. Generally in your nursery/school, when at work with children, how often is covering something else on your agenda more pressing than implementing physical activity?

|       |   |   |   |   |   |        |
|-------|---|---|---|---|---|--------|
|       |   |   |   |   |   |        |
| 1     | 2 | 3 | 4 | 5 | 6 | 7      |
| Never |   |   |   |   |   | Always |

30. How often do you forget to implement physical activity in your nursery/school, when at work with young children?

|       |   |   |   |   |   |        |
|-------|---|---|---|---|---|--------|
|       |   |   |   |   |   |        |
| 1     | 2 | 3 | 4 | 5 | 6 | 7      |
| Never |   |   |   |   |   | Always |

31. When I need to concentrate on implementing physical activity in my nursery/school, when at work with young children, I have no trouble focusing my attention.

|                      |   |   |   |   |   |                   |
|----------------------|---|---|---|---|---|-------------------|
|                      |   |   |   |   |   |                   |
| 1                    | 2 | 3 | 4 | 5 | 6 | 7                 |
| Strongly<br>Disagree |   |   |   |   |   | Strongly<br>Agree |

32. When trying to focus my attention on implementing physical activity in my nursery/school, when at work with young children, I have difficulty blocking out distracting thoughts.

|       |   |   |   |   |   |        |
|-------|---|---|---|---|---|--------|
|       |   |   |   |   |   |        |
| 1     | 2 | 3 | 4 | 5 | 6 | 7      |
| Never |   |   |   |   |   | Always |

33. When concentrating on implementing physical activity in my nursery/school, when at work with young children, I can focus my attention so that I become unaware of what's going on around me.

|       |   |   |   |   |   |        |
|-------|---|---|---|---|---|--------|
|       |   |   |   |   |   |        |
| 1     | 2 | 3 | 4 | 5 | 6 | 7      |
| Never |   |   |   |   |   | Always |

34. Within the social-political context there is sufficient financial support (e.g. local authorities, government) for implementing physical activity guidelines in early years settings.

|                   |   |   |   |   |   |                |
|-------------------|---|---|---|---|---|----------------|
|                   |   |   |   |   |   |                |
| 1                 | 2 | 3 | 4 | 5 | 6 | 7              |
| Strongly Disagree |   |   |   |   |   | Strongly Agree |

35. Within the socio-political context there are good networks between parties involved in guidelines for implementing physical activity in nursery/school settings.

|                   |   |   |   |   |   |                |
|-------------------|---|---|---|---|---|----------------|
|                   |   |   |   |   |   |                |
| 1                 | 2 | 3 | 4 | 5 | 6 | 7              |
| Strongly Disagree |   |   |   |   |   | Strongly Agree |

36. Most people who are important to me think that I should implement physical activity in my nursery/school, when at work with young children.

|                   |   |   |   |   |   |                |
|-------------------|---|---|---|---|---|----------------|
|                   |   |   |   |   |   |                |
| 1                 | 2 | 3 | 4 | 5 | 6 | 7              |
| Strongly Disagree |   |   |   |   |   | Strongly Agree |

37. Most people whose opinion I value would approve me to implement physical activity in my nursery/school, when at work with young children.

|                   |   |   |   |   |   |                |
|-------------------|---|---|---|---|---|----------------|
|                   |   |   |   |   |   |                |
| 1                 | 2 | 3 | 4 | 5 | 6 | 7              |
| Strongly Disagree |   |   |   |   |   | Strongly Agree |

38. Have you recently, during the past two weeks, been able to enjoy your normal day-to-day activities?

|       |   |   |   |   |   |        |
|-------|---|---|---|---|---|--------|
|       |   |   |   |   |   |        |
| 1     | 2 | 3 | 4 | 5 | 6 | 7      |
| Never |   |   |   |   |   | Always |

39. Have you recently, during the past two weeks, been feeling unhappy and depressed?

|       |   |   |   |   |   |        |
|-------|---|---|---|---|---|--------|
|       |   |   |   |   |   |        |
| 1     | 2 | 3 | 4 | 5 | 6 | 7      |
| Never |   |   |   |   |   | Always |

40. I have a clear plan of how I will implement physical activity in my nursery/school, when at work with young children.

|                   |   |   |   |   |   |                |
|-------------------|---|---|---|---|---|----------------|
|                   |   |   |   |   |   |                |
| 1                 | 2 | 3 | 4 | 5 | 6 | 7              |
| Strongly Disagree |   |   |   |   |   | Strongly Agree |

41. I have a clear plan on under what circumstances I will implement physical activity in my nursery/school with young children.

|                   |   |   |   |   |   |                |
|-------------------|---|---|---|---|---|----------------|
|                   |   |   |   |   |   |                |
| 1                 | 2 | 3 | 4 | 5 | 6 | 7              |
| Strongly Disagree |   |   |   |   |   | Strongly Agree |

42. I have a clear plan when I will implement physical activity in my nursery/school with young children.

|                   |   |   |   |   |   |                |
|-------------------|---|---|---|---|---|----------------|
|                   |   |   |   |   |   |                |
| 1                 | 2 | 3 | 4 | 5 | 6 | 7              |
| Strongly Disagree |   |   |   |   |   | Strongly Agree |

43. I have a clear plan on how often I will implement physical activity in my nursery/school, when at work with young children.

|                   |   |   |   |   |   |                |
|-------------------|---|---|---|---|---|----------------|
|                   |   |   |   |   |   |                |
| 1                 | 2 | 3 | 4 | 5 | 6 | 7              |
| Strongly Disagree |   |   |   |   |   | Strongly Agree |

44. I can see how promoting physical activity differs from usual ways of working at my nursery/school.

|                      |   |   |   |   |   |                   |
|----------------------|---|---|---|---|---|-------------------|
|                      |   |   |   |   |   |                   |
| 1                    | 2 | 3 | 4 | 5 | 6 | 7                 |
| Strongly<br>Disagree |   |   |   |   |   | Strongly<br>Agree |

45. I believe that promoting physical activity at my nursery/school is a legitimate part of my role.

|                      |   |   |   |   |   |                   |
|----------------------|---|---|---|---|---|-------------------|
|                      |   |   |   |   |   |                   |
| 1                    | 2 | 3 | 4 | 5 | 6 | 7                 |
| Strongly<br>Disagree |   |   |   |   |   | Strongly<br>Agree |

46. Sufficient resources are available at my nursery/school to support promoting physical activity.

|                      |   |   |   |   |   |                   |
|----------------------|---|---|---|---|---|-------------------|
|                      |   |   |   |   |   |                   |
| 1                    | 2 | 3 | 4 | 5 | 6 | 7                 |
| Strongly<br>Disagree |   |   |   |   |   | Strongly<br>Agree |

47. Management at my nursery/school adequately support promoting physical activity.

|                      |   |   |   |   |   |                   |
|----------------------|---|---|---|---|---|-------------------|
|                      |   |   |   |   |   |                   |
| 1                    | 2 | 3 | 4 | 5 | 6 | 7                 |
| Strongly<br>Disagree |   |   |   |   |   | Strongly<br>Agree |

48. Promoting physical activity fits well with strategic goals of my nursery/school.

|                      |   |   |   |   |   |                   |
|----------------------|---|---|---|---|---|-------------------|
|                      |   |   |   |   |   |                   |
| 1                    | 2 | 3 | 4 | 5 | 6 | 7                 |
| Strongly<br>Disagree |   |   |   |   |   | Strongly<br>Agree |

49. Staff in my nursery/school have a shared understanding of the purpose of promoting physical activity.

|                      |   |   |   |   |   |                   |
|----------------------|---|---|---|---|---|-------------------|
|                      |   |   |   |   |   |                   |
| 1                    | 2 | 3 | 4 | 5 | 6 | 7                 |
| Strongly<br>Disagree |   |   |   |   |   | Strongly<br>Agree |

50. Staff in my nursery/school agree that promoting physical activity in early years is worthwhile.

|                      |   |   |   |   |   |                   |
|----------------------|---|---|---|---|---|-------------------|
|                      |   |   |   |   |   |                   |
| 1                    | 2 | 3 | 4 | 5 | 6 | 7                 |
| Strongly<br>Disagree |   |   |   |   |   | Strongly<br>Agree |

**Thank you for your collaboration!**
